# Supplementary material for: Cryptand derived fluorescence signaling systems for sensing Hg(ii) ion: A comparative study
Source: Royal Society of Chemistry journal article supplement (doi:10.1039/c0dt01005g), 2010-12-01
Supplement: c0dt01005g.pdf [file c0dt01005g.pdf]

## Cryptand derived fluorescence signaling systems for sensing Hg(II) ion : a comparative study

Kalyan K. Sadhu, Susan Sen and Parimal K. Bharadwaj\*

*Chemistry Department, Indian Institute of Technology Kanpur, 208016 India*

*Email: pkb@iitk.ac.in*

### Supporting Information

#### Captions for the Figures and Tables:

- Fig. S1:** ESI-MS spectrum of **L<sub>3</sub>**.  
**Fig. S2:** 500 MHz <sup>1</sup>H-NMR spectrum of **L<sub>3</sub>**.  
**Fig. S3:** 125 MHz <sup>13</sup>C-NMR spectrum of **L<sub>3</sub>**.  
**Fig. S4:** ESI-MS spectrum of **L<sub>7</sub>**.  
**Fig. S5:** 500 MHz <sup>1</sup>H-NMR spectrum of **L<sub>7</sub>**.  
**Fig. S6:** 125 MHz <sup>13</sup>C-NMR spectrum of **L<sub>7</sub>**.  
**Fig. S7:** ESI-MS spectrum of **L<sub>8</sub>**.  
**Fig. S8:** 500 MHz <sup>1</sup>H-NMR spectrum of **L<sub>8</sub>**.  
**Fig. S9:** 125 MHz <sup>13</sup>C-NMR spectrum of **L<sub>8</sub>**.  
**Fig. S10:** ESI-MS spectrum of **L<sub>9</sub>**.  
**Fig. S11:** 500 MHz <sup>1</sup>H-NMR spectrum of **L<sub>9</sub>**.  
**Fig. S12:** 125 MHz <sup>13</sup>C-NMR spectrum of **L<sub>9</sub>**.

**Table ST1A:** Absorption and molar extinction coefficient ( $\epsilon$ ) of **L<sub>1</sub>** alone and in presence of different metal ions in MeCN.

**Table ST1B** Absorption and molar extinction coefficient ( $\epsilon$ ) of **L<sub>7</sub>** alone and in presence of different metal ions in MeCN.

**Table ST2A:** Absorption and molar extinction coefficient ( $\epsilon$ ) of **L<sub>2</sub>** alone and in presence of different metal ions in MeCN.

**Table ST2B:** Absorption and molar extinction coefficient ( $\epsilon$ ) of **L<sub>8</sub>** alone and in presence of different metal ions in MeCN.

**Table ST3A:** Absorption and molar extinction coefficient ( $\epsilon$ ) of **L<sub>3</sub>** alone and in presence of different metal ions in MeCN.

**Table ST3B:** Absorption and molar extinction coefficient ( $\epsilon$ ) of **L<sub>9</sub>** alone and in presence of different metal ions in MeCN.

**Fig. S13A-S15A:** Absorption spectra of **L<sub>1</sub>**, **L<sub>2</sub>** and **L<sub>3</sub>** in presence of different ionic inputs in MeCN.

**Fig. S13B-S15B:** Absorption spectra of **L<sub>7</sub>**, **L<sub>8</sub>** and **L<sub>9</sub>** in presence of different ionic inputs in MeCN.

**Table ST4:** Absorption and molar extinction coefficient ( $\epsilon$ ) of **L<sub>4</sub>** alone and in presence of different metal ions in MeCN.

**Table ST5:** Absorption and molar extinction coefficient ( $\epsilon$ ) of **L<sub>5</sub>** alone and in presence of different metal ions in MeCN.

**Table ST6:** Absorption and molar extinction coefficient ( $\epsilon$ ) of **L<sub>6</sub>** alone and in presence of different metal ions in MeCN.

**Table ST7A:** Fluorescence output of **L<sub>1</sub>-L<sub>3</sub>** with different ionic inputs.

**Table ST7B:** Fluorescence output of **L<sub>7</sub>-L<sub>9</sub>** with different ionic inputs.

**Fig. S16:** Absorption spectra of **L<sub>1</sub>** in presence of increasing concentration of Hg(II) ionic inputs in MeCN.

**Fig. S17-S19:** Absorption and emission spectra of **L<sub>2</sub>** in presence of increasing concentration of Hg(II) ionic inputs and plots of fluorescence quantum yield of **L<sub>2</sub>** as a function of concentration of Hg(II) added in MeCN.

**Fig. S20-S22:** Absorption and emission spectra of **L<sub>3</sub>** in presence of increasing concentration of Hg(II) ionic inputs and plots of fluorescence quantum yield of **L<sub>3</sub>** as a function of concentration of Hg(II) added in MeCN.

**Fig. S23-S24:** Linear regression plots for complex stability constant determination of **L<sub>2</sub>** and **L<sub>3</sub>** in presence of Hg(II) as ionic input in MeCN.

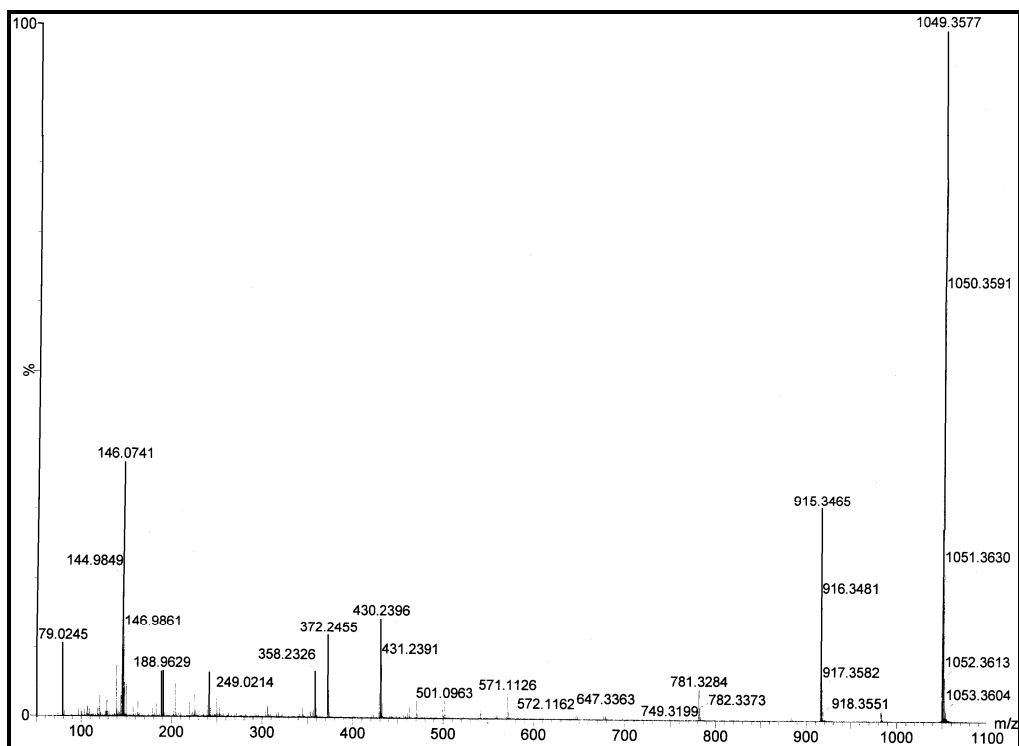

**Fig. S1:** ESI-MS spectrum of  $L_3$ .

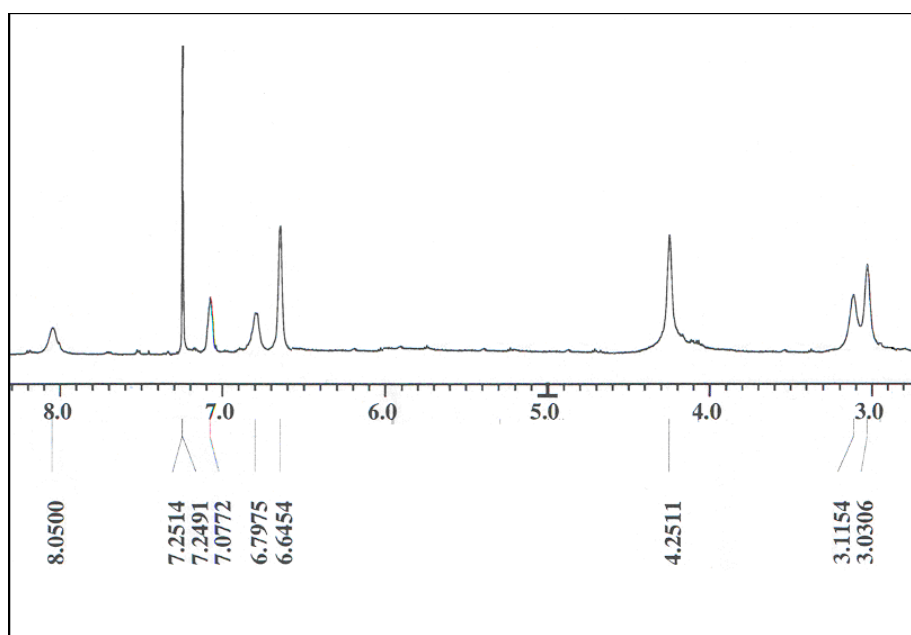

**Fig. S2:** 500 MHz  $^1H$ -NMR spectrum of  $L_3$ .

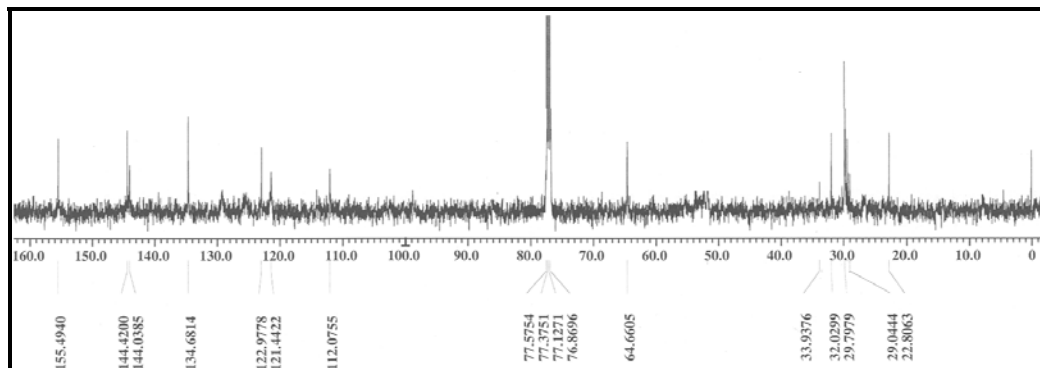

**Fig. S3:** 125 MHz  $^{13}\text{C}$ -NMR spectrum of  $\text{L}_3$ .

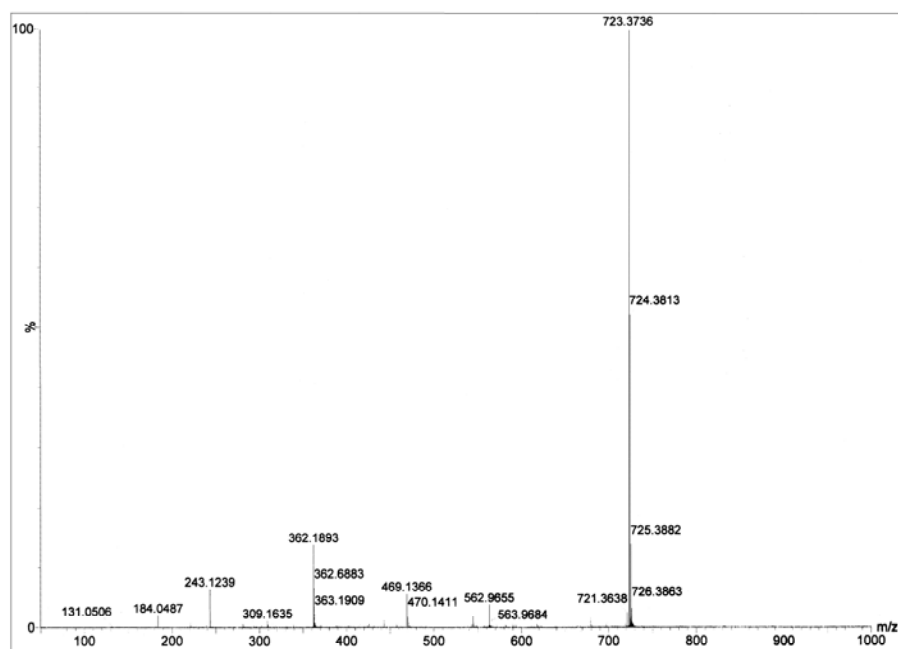

**Fig. S4:** ESI-MS spectrum of  $\text{L}_7$ .

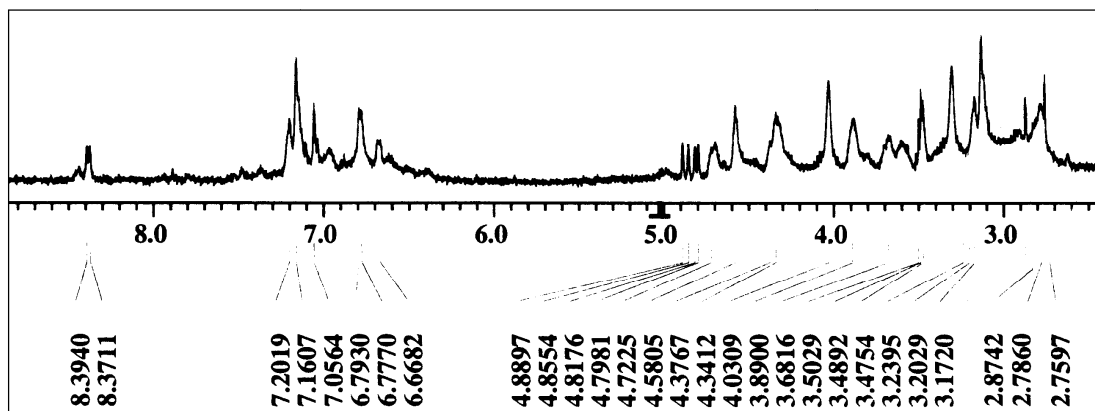

Fig. S5: 500 MHz  $^1\text{H}$ -NMR spectrum of  $\text{L}_7$ .

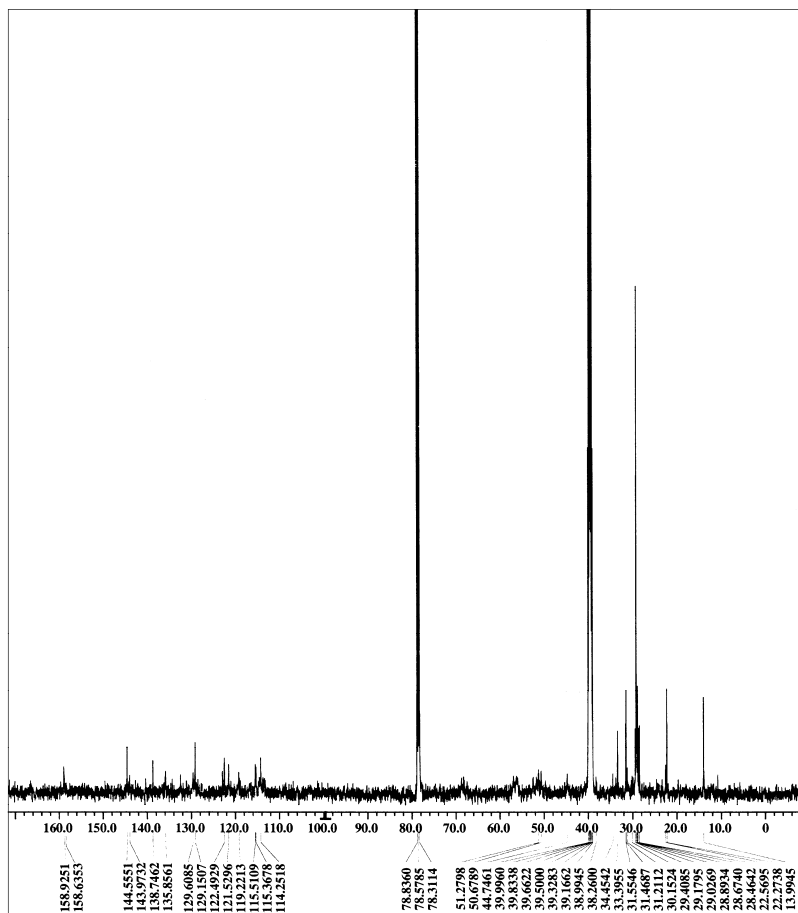

Fig. S6: 125 MHz  $^{13}\text{C}$ -NMR spectrum of  $\text{L}_7$ .

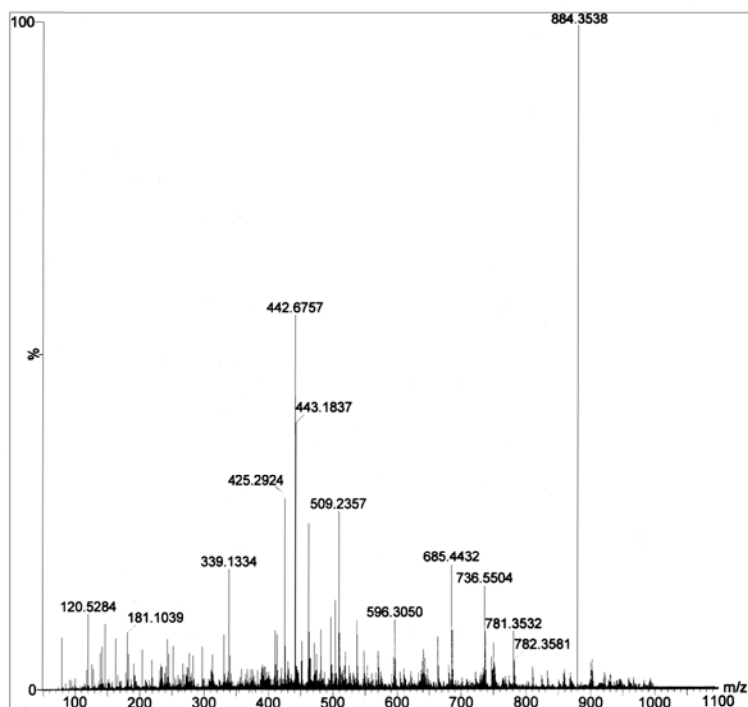

Fig. S7: ESI-MS spectrum of  $L_8$

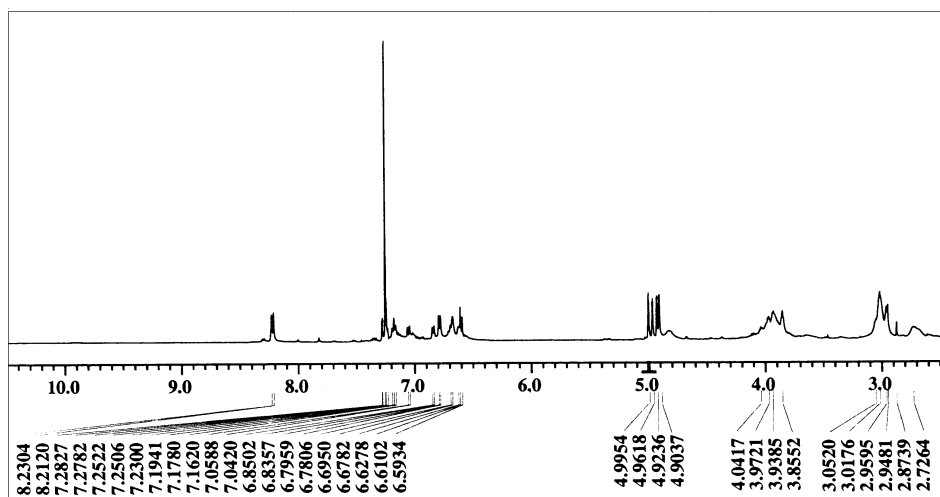

Fig. S8: 500 MHz  $^1H$ -NMR spectrum of  $L_8$ .

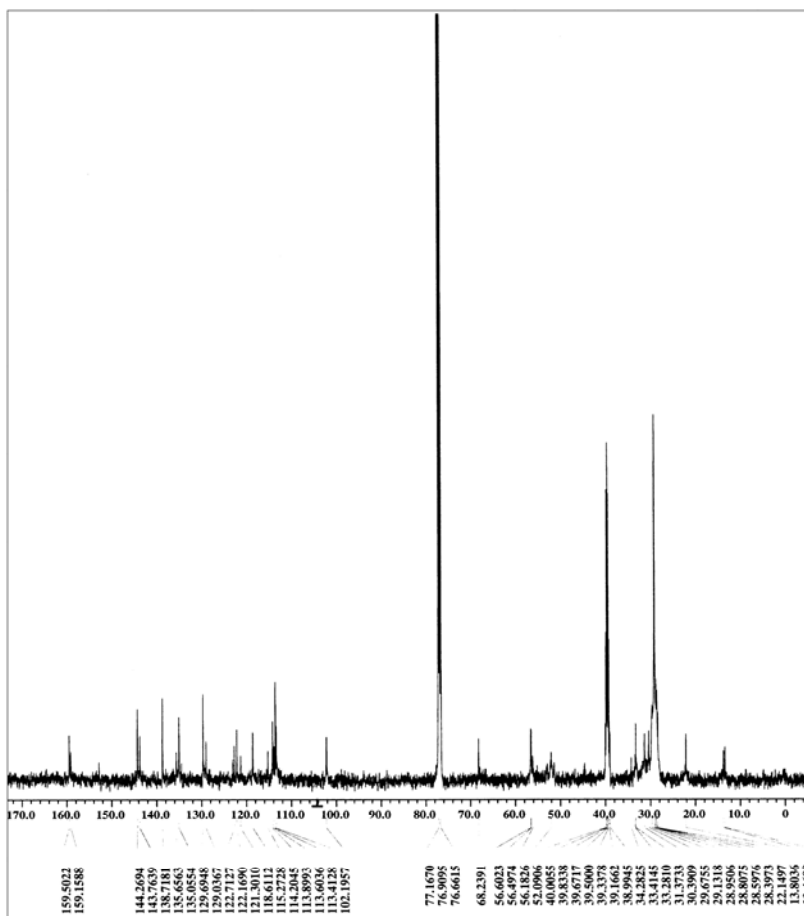

Fig. S9: 125 MHz  $^{13}\text{C}$ -NMR spectrum of  $\text{L}_8$ .

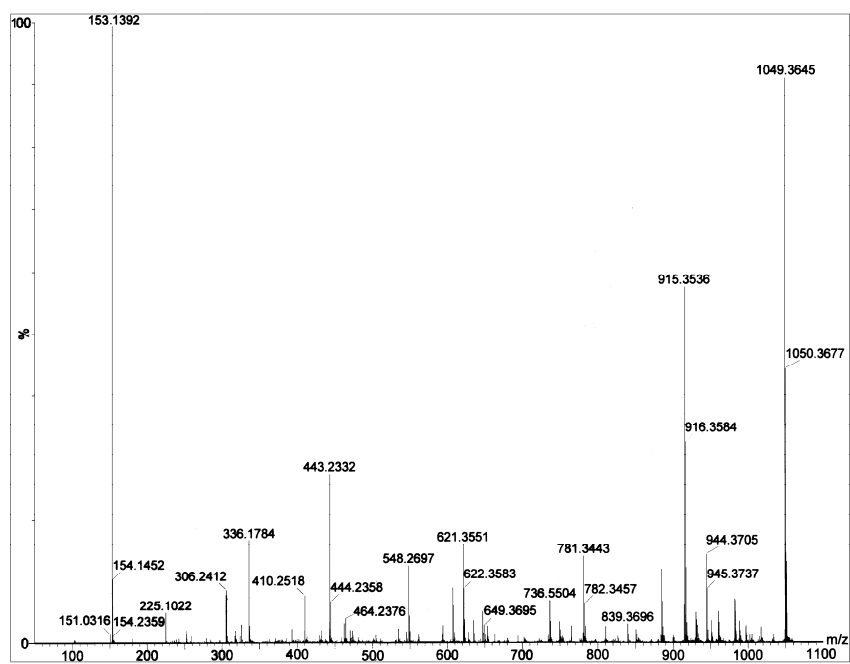

Fig. S10: ESI-MS spectrum of  $\text{L}_9$

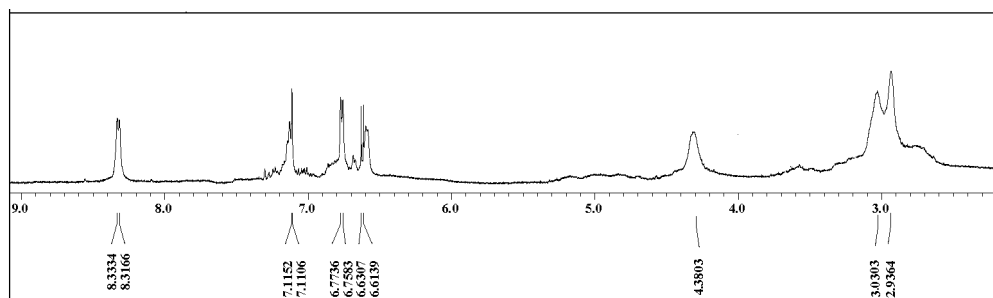

**Fig. S11:** 500 MHz  $^1\text{H}$ -NMR spectrum of  $\text{L}_9$ .

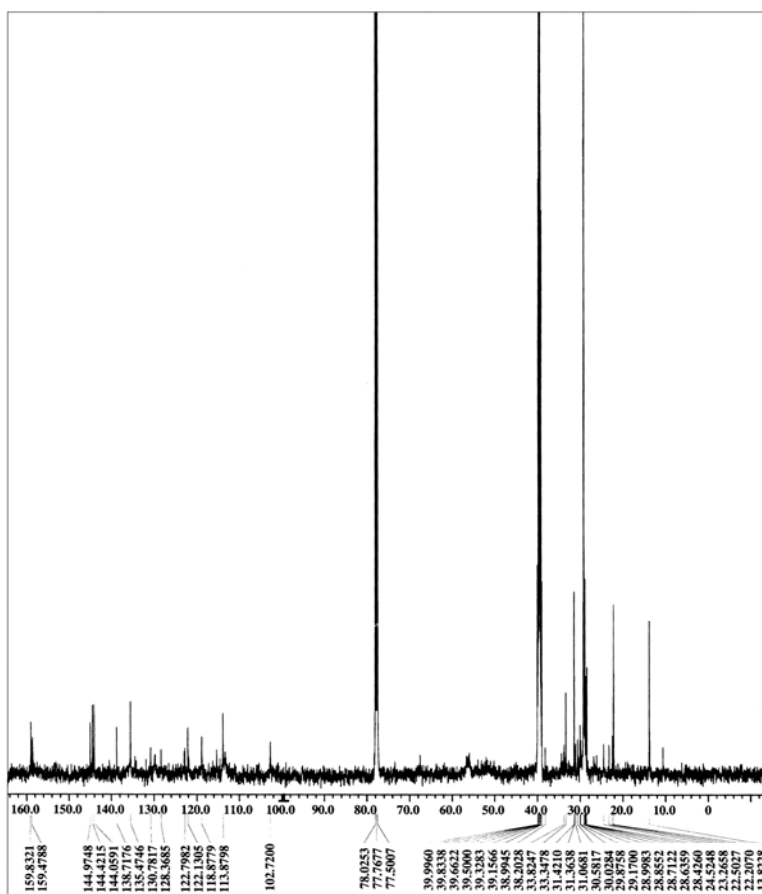

**Fig. S12:** 125 MHz  $^{13}\text{C}$ -NMR spectrum of  $\text{L}_9$ .



**Table ST1A:** Absorption and molar extinction coefficient ( $\epsilon$ ) of **L<sub>1</sub>** alone and in presence of different metal ions in MeCN. Conc. of **L<sub>1</sub>** =  $1.15 \times 10^{-5}$  (M)

|                             | Absorption                                                                   |            |
|-----------------------------|------------------------------------------------------------------------------|------------|
|                             | $\lambda$ , nm ( $\epsilon$ , $\text{dm}^3 \text{mol}^{-1} \text{cm}^{-1}$ ) |            |
| <b>L<sub>1</sub></b>        | 483 (12470)                                                                  | 342 (5434) |
| <b>L<sub>1</sub>+Cd(II)</b> | 479 (12478)                                                                  | 339 (5357) |
| <b>L<sub>1</sub>+Hg(II)</b> | 465 (11130)                                                                  | 331 (4826) |

**Table ST1B** Absorption and molar extinction coefficient ( $\epsilon$ ) of **L<sub>7</sub>** alone and in presence of different metal ions in MeCN. Conc. of **L<sub>7</sub>** =  $1.056 \times 10^{-5}$  (M)

|                                    | Absorption                                                                   |             |             |
|------------------------------------|------------------------------------------------------------------------------|-------------|-------------|
|                                    | $\lambda$ , nm ( $\epsilon$ , $\text{dm}^3 \text{mol}^{-1} \text{cm}^{-1}$ ) |             |             |
| <b>L<sub>7</sub></b>               | 482 (15915)                                                                  | 343(5773)   | 277 (2724)  |
| <b>L<sub>7</sub>+Mn(II)</b>        | 479 (16812)                                                                  | 341 (6184)  | 274 (2473)  |
| <b>L<sub>7</sub>+Fe(II)</b>        | 454 (6116)                                                                   | 354 (18029) | 273 (14679) |
| <b>L<sub>7</sub>+Co(II)</b>        | 472 (22881)                                                                  | 334 (4773)  | 275 (1893)  |
| <b>L<sub>7</sub>+Ni(II)</b>        | 478 (14830)                                                                  | 347 (5354)  | 274 (1473)  |
| <b>L<sub>7</sub>+Cu(II)</b>        | 457 (8234)                                                                   | 321 (3309)  |             |
| <b>L<sub>7</sub>+Zn(II)</b>        | 473 (14856)                                                                  | 339 (5088)  | 274 (2177)  |
| <b>L<sub>7</sub>+Cd(II)</b>        | 477 (15032)                                                                  | 343 (6241)  | 276 (2493)  |
| <b>L<sub>7</sub>+Ag(I)</b>         | 469(14419)                                                                   | 334 (4718)  | 275 (1828)  |
| <b>L<sub>7</sub>+Hg(II)</b>        | 469 (12356)                                                                  | 334 (2846)  |             |
| <b>L<sub>7</sub>+Pb(II)</b>        | 469 (9311)                                                                   | 334 (1497)  | 272 (3362)  |
| <b>L<sub>7</sub>+H<sup>+</sup></b> | 464(13478)                                                                   | 331 (3854)  | 270 (1479)  |

**Table ST2A:** Absorption and molar extinction coefficient ( $\epsilon$ ) of **L<sub>2</sub>** alone and in presence of different metal ions in MeCN. Conc. of **L<sub>2</sub>** =  $4.12 \times 10^{-5}$  (M)

|                                    | Absorption                                                                         |             |            |
|------------------------------------|------------------------------------------------------------------------------------|-------------|------------|
|                                    | $\lambda$ , nm ( $\epsilon$ , dm <sup>3</sup> mol <sup>-1</sup> cm <sup>-1</sup> ) |             |            |
| <b>L<sub>2</sub></b>               | 486 (24544)                                                                        | 342 (9687)  | 272 (4614) |
| <b>L<sub>2</sub>+Mn(II)</b>        | 479 (23813)                                                                        | 338 (9211)  | 271 (4158) |
| <b>L<sub>2</sub>+Fe(II)</b>        | 452 (16910)                                                                        | 321 (8813)  | 275 (5177) |
| <b>L<sub>2</sub>+Co(II)</b>        | 475 (25805)                                                                        | 335 (9211)  | 268 (4150) |
| <b>L<sub>2</sub>+Ni(II)</b>        | 479 (23711)                                                                        | 341 (9339)  | 272 (4107) |
| <b>L<sub>2</sub>+Cu(II)</b>        | 453 (17643)                                                                        | 321 (8653)  |            |
| <b>L<sub>2</sub>+Zn(II)</b>        | 474 (23532)                                                                        | 336 (9313)  | 267 (4284) |
| <b>L<sub>2</sub>+Cd(II)</b>        | 479 (24000)                                                                        | 341 (9294)  | 272 (4131) |
| <b>L<sub>2</sub>+Ag(I)</b>         | 484 (25883)                                                                        | 341 (9774)  | 272 (4456) |
| <b>L<sub>2</sub>+Hg(II)</b>        | 469 (21886)                                                                        | 333 (8498)  | 276 (3881) |
| <b>L<sub>2</sub>+Pb(II)</b>        | 478 (23580)                                                                        | 335 (10051) | 272 (6995) |
| <b>L<sub>2</sub>+H<sup>+</sup></b> | 456 (21541)                                                                        | 328 (8641)  | 270 (4694) |

**Table ST2B:** Absorption and molar extinction coefficient ( $\epsilon$ ) of **L<sub>8</sub>** alone and in presence of different metal ions in MeCN. Conc. of **L<sub>8</sub>** =  $0.997 \times 10^{-5}$  (M)

|                                    | Absorption                                                                         |             |            |
|------------------------------------|------------------------------------------------------------------------------------|-------------|------------|
|                                    | $\lambda$ , nm ( $\epsilon$ , dm <sup>3</sup> mol <sup>-1</sup> cm <sup>-1</sup> ) |             |            |
| <b>L<sub>8</sub></b>               | 483 (36074)                                                                        | 341(11704)  | 273 (7227) |
| <b>L<sub>8</sub>+Mn(II)</b>        | 479 (32585)                                                                        | 338 (9977)  | 271 (5196) |
| <b>L<sub>8</sub>+Fe(II)</b>        | 461 (26158)                                                                        | 353 (63976) | 274(59314) |
| <b>L<sub>8</sub>+Co(II)</b>        | 477 (40220)                                                                        | 337 (10545) | 277 (8330) |
| <b>L<sub>8</sub>+Ni(II)</b>        | 481(35690)                                                                         | 341 (11668) | 270 (5878) |
| <b>L<sub>8</sub>+Cu(II)</b>        | 453 (21885)                                                                        | 294(18245)  |            |
| <b>L<sub>8</sub>+Zn(II)</b>        | 474 (24565)                                                                        | 336(7239)   | 271 (4571) |
| <b>L<sub>8</sub>+Cd(II)</b>        | 479 (31277)                                                                        | 340 (9434)  | 271( 4721) |
| <b>L<sub>8</sub>+Ag(I)</b>         | 463(26842)                                                                         | 334 (8258)  | 275 (5320) |
| <b>L<sub>8</sub>+Hg(II)</b>        | 461 (29895)                                                                        | 327 (9447)  |            |
| <b>L<sub>8</sub>+Pb(II)</b>        | 461 (27928)                                                                        | 327 (11109) |            |
| <b>L<sub>8</sub>+H<sup>+</sup></b> | 462(29335)                                                                         | 327 (9278)  | 270 (6755) |

**Table ST3A:** Absorption and molar extinction coefficient ( $\epsilon$ ) of **L<sub>3</sub>** alone and in presence of different metal ions in MeCN. Conc. of **L<sub>3</sub>** =  $3.2 \times 10^{-5}$  (M)

|                                    | Absorption                                                                         |             |            |
|------------------------------------|------------------------------------------------------------------------------------|-------------|------------|
|                                    | $\lambda$ , nm ( $\epsilon$ , dm <sup>3</sup> mol <sup>-1</sup> cm <sup>-1</sup> ) |             |            |
| <b>L<sub>3</sub></b>               | 482 (32953)                                                                        | 337 (12147) | 267 (5097) |
| <b>L<sub>3</sub>+Mn(II)</b>        | 483 (31181)                                                                        | 337 (11150) | 269 (4750) |
| <b>L<sub>3</sub>+Fe(II)</b>        | 466 (24575)                                                                        | 330 (11288) | 274 (5540) |
| <b>L<sub>3</sub>+Co(II)</b>        | 477 (33456)                                                                        | 335 (11559) | 267 (4716) |
| <b>L<sub>3</sub>+Ni(II)</b>        | 480 (32269)                                                                        | 337 (11716) | 267 (4806) |
| <b>L<sub>3</sub>+Cu(II)</b>        | 455 (24475)                                                                        | 321 (11634) |            |
| <b>L<sub>3</sub>+Zn(II)</b>        | 477 (31138)                                                                        | 336 (11581) | 264 (4916) |
| <b>L<sub>3</sub>+Cd(II)</b>        | 480 (30663)                                                                        | 337 (11025) | 267 (4428) |
| <b>L<sub>3</sub>+Ag(I)</b>         | 487 (30063)                                                                        | 340 (10675) | 271 (4809) |
| <b>L<sub>3</sub>+Hg(II)</b>        | 472 (28850)                                                                        | 333 (11181) |            |
| <b>L<sub>3</sub>+Pb(II)</b>        | 477 (31500)                                                                        | 335 (12709) | 275 (7631) |
| <b>L<sub>3</sub>+H<sup>+</sup></b> | 460 (27694)                                                                        | 327 (11253) | 270 (5588) |

**Table ST3B:** Absorption and molar extinction coefficient ( $\epsilon$ ) of **L<sub>9</sub>** alone and in presence of different metal ions in MeCN. Conc. of **L<sub>9</sub>** =  $1.0715 \times 10^{-5}$  (M)

|                                    | Absorption                                                                         |             |            |
|------------------------------------|------------------------------------------------------------------------------------|-------------|------------|
|                                    | $\lambda$ , nm ( $\epsilon$ , dm <sup>3</sup> mol <sup>-1</sup> cm <sup>-1</sup> ) |             |            |
| <b>L<sub>9</sub></b>               | 483 (42702)                                                                        | 341(16583)  | 274 (7896) |
| <b>L<sub>9</sub>+Mn(II)</b>        | 481(44962)                                                                         | 340 (16330) | 270 (7560) |
| <b>L<sub>9</sub>+Fe(II)</b>        | 449 (24340)                                                                        | 350 (56891) | 273(56426) |
| <b>L<sub>9</sub>+Co(II)</b>        | 470 (39863)                                                                        | 333(12602)  | 270 (7195) |
| <b>L<sub>9</sub>+Ni(II)</b>        | 483(44683)                                                                         | 339 (16801) | 269(7752)  |
| <b>L<sub>9</sub>+Cu(II)</b>        | 454 (22860)                                                                        | 294(13075)  |            |
| <b>L<sub>9</sub>+Zn(II)</b>        | 481 (37777)                                                                        | 337(13844)  | 270 (6911) |
| <b>L<sub>9</sub>+Cd(II)</b>        | 473 (3646)                                                                         | 337 (12929) | 270( 5917) |
| <b>L<sub>9</sub>+Ag(I)</b>         | 463(29783)                                                                         | 328 (11318) | 270 (5851) |
| <b>L<sub>9</sub>+Hg(II)</b>        | 461 (26517)                                                                        | 327 (10403) |            |
| <b>L<sub>9</sub>+Pb(II)</b>        | 473 (30672)                                                                        | 330 (14632) |            |
| <b>L<sub>9</sub>+H<sup>+</sup></b> | 462(32452)                                                                         | 327 (12940) | 270 (8574) |

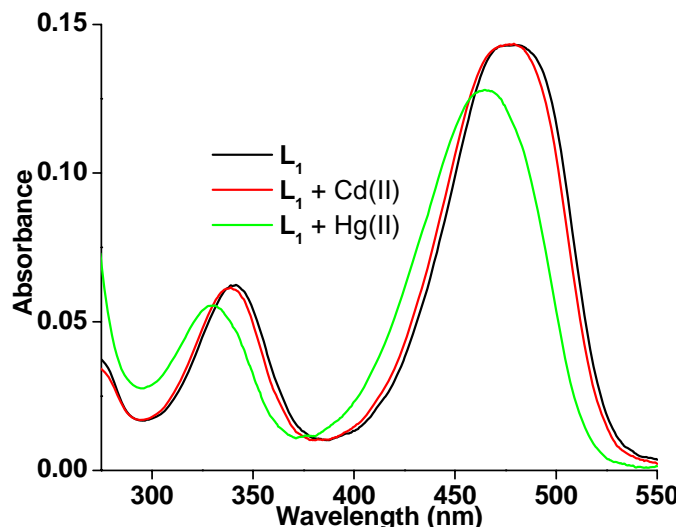

**Fig. S13A:** Absorption spectra of  $L_1$  in presence of different ionic inputs in MeCN.

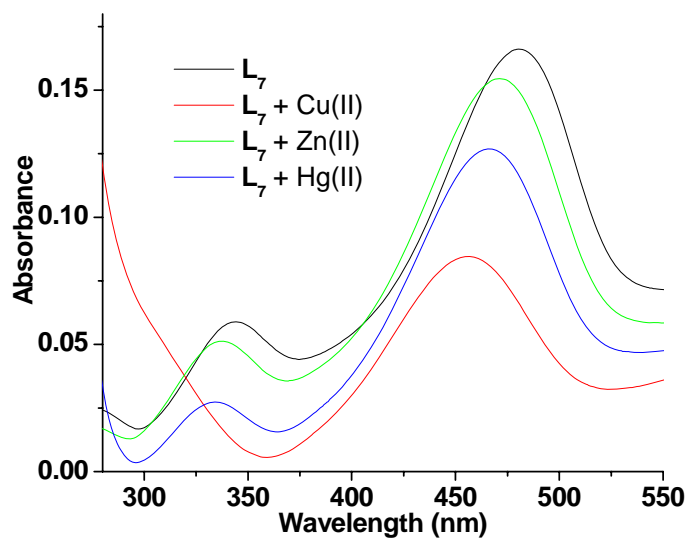

**Fig. S13B:** Absorption spectra of  $L_7$  in presence of different ionic inputs in MeCN.

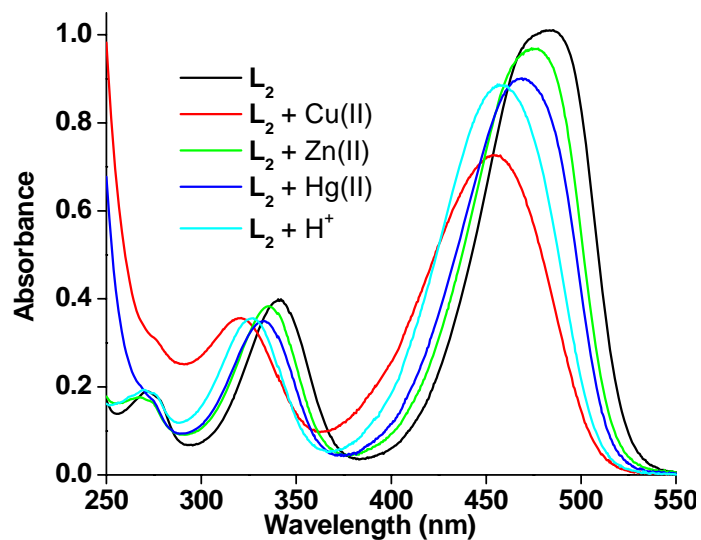

**Fig. S14A:** Absorption spectra of  $L_2$  in presence of different ionic inputs in MeCN.

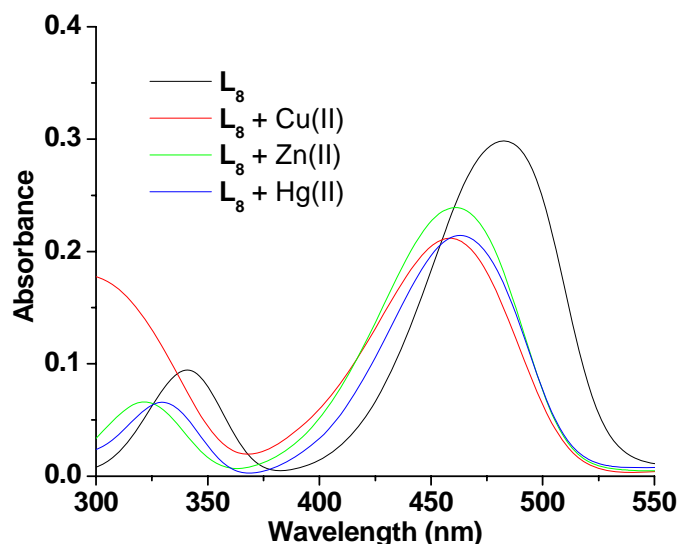

**Fig. S14B:** Absorption spectra of  $L_8$  in presence of different ionic inputs in MeCN.

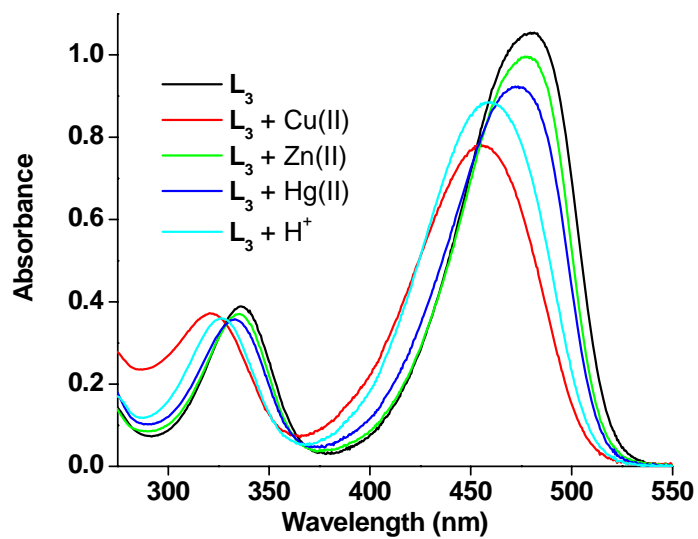

**Fig. S15A:** Absorption spectra of  $L_3$  in presence of different ionic inputs in MeCN.

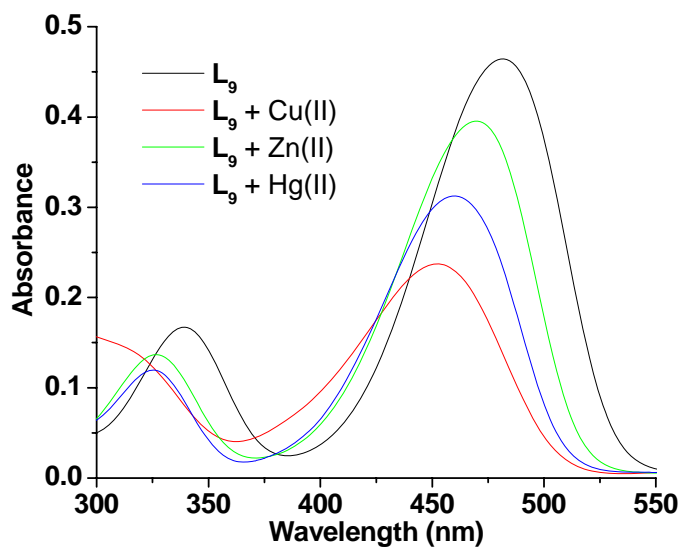

**Fig. S15B:** Absorption spectra of  $L_9$  in presence of different ionic inputs in MeCN.

**Table ST4:** Absorption and molar extinction coefficient ( $\epsilon$ ) of **L<sub>4</sub>** alone and in presence of different metal ions in MeCN. Conc. of **L<sub>4</sub>** =  $5.0 \times 10^{-5}$  (M)

|                             | Absorption                                                                         |            |            |            |            |
|-----------------------------|------------------------------------------------------------------------------------|------------|------------|------------|------------|
|                             | $\lambda$ , nm ( $\epsilon$ , dm <sup>3</sup> mol <sup>-1</sup> cm <sup>-1</sup> ) |            |            |            |            |
| <b>L<sub>4</sub></b>        | 387 (6956)                                                                         | 367 (7828) | 349 (5010) | 332 (2698) | 317 (1564) |
| <b>L<sub>4</sub>+Zn(II)</b> | 390 (5734)                                                                         | 370 (6642) | 353 (4748) | 335 (2668) | 320 (1598) |
| <b>L<sub>4</sub>+Hg(II)</b> | 392 (5344)                                                                         | 373 (6424) | 355 (4942) | 335 (2712) | 321 (1744) |

**Table ST5:** Absorption and molar extinction coefficient ( $\epsilon$ ) of **L<sub>5</sub>** alone and in presence of different metal ions in MeCN. Conc. of **L<sub>5</sub>** =  $1.42 \times 10^{-5}$  (M)

|                             | Absorption                                                                         |             |            |            |            |
|-----------------------------|------------------------------------------------------------------------------------|-------------|------------|------------|------------|
|                             | $\lambda$ , nm ( $\epsilon$ , dm <sup>3</sup> mol <sup>-1</sup> cm <sup>-1</sup> ) |             |            |            |            |
| <b>L<sub>5</sub></b>        | 387 (13563)                                                                        | 367 (13683) | 350 (9514) | 333 (6296) | 318 (1564) |
| <b>L<sub>5</sub>+Zn(II)</b> | 389 (12817)                                                                        | 370 (13021) | 352 (9261) | 335 (5641) |            |
| <b>L<sub>5</sub>+Hg(II)</b> | 391 (12789)                                                                        | 371 (13261) | 354 (9951) | 334 (6147) |            |

**Table ST6:** Absorption and molar extinction coefficient ( $\epsilon$ ) of **L<sub>6</sub>** alone and in presence of different metal ions in MeCN. Conc. of **L<sub>6</sub>** =  $0.95 \times 10^{-5}$  (M)

|                             | Absorption                                                                         |             |             |             |            |
|-----------------------------|------------------------------------------------------------------------------------|-------------|-------------|-------------|------------|
|                             | $\lambda$ , nm ( $\epsilon$ , dm <sup>3</sup> mol <sup>-1</sup> cm <sup>-1</sup> ) |             |             |             |            |
| <b>L<sub>6</sub></b>        | 390 (20916)                                                                        | 370 (24653) | 352 (18305) | 334 (11832) | 318 (7758) |
| <b>L<sub>6</sub>+Zn(II)</b> | 391 (21832)                                                                        | 371 (25768) | 352 (18537) | 337 (10863) | 320 (6316) |
| <b>L<sub>6</sub>+Hg(II)</b> | 392 (19453)                                                                        | 373 (24232) | 354 (18600) | 336 (10484) |            |

**Table ST7A:** Fluorescence output of **L<sub>1</sub>-L<sub>3</sub>** with different ionic inputs.

| Inputs         | Quantum Yield $\phi$ (Enhancement Factor) ( $\lambda_{\text{ex}}=345$ nm) |                                |                                |
|----------------|---------------------------------------------------------------------------|--------------------------------|--------------------------------|
|                | <b>L<sub>1</sub></b><br>$\phi$                                            | <b>L<sub>2</sub></b><br>$\phi$ | <b>L<sub>3</sub></b><br>$\phi$ |
| None           | 0.002                                                                     | 0.003                          | 0.004                          |
| Mn(II)         | 0.120 (60)                                                                | 0.185 (62)                     | 0.251 (63)                     |
| Fe(II)         | 0.100 (50)                                                                | 0.157 (52)                     | 0.232 (58)                     |
| Co(II)         | 0.096 (48)                                                                | 0.176 (59)                     | 0.267 (67)                     |
| Ni(II)         | 0.076 (38)                                                                | 0.154 (51)                     | 0.244 (61)                     |
| Cu(II)         | 0.084 (42)                                                                | 0.170 (57)                     | 0.302 (76)                     |
| Zn(II)         | 0.190 (95)                                                                | 0.289 (96)                     | 0.412 (103)                    |
| Cd(II)         | 0.427 (214)                                                               | 0.418 (139)                    | 0.377 (94)                     |
| Ag(I)          | 0.170 (85)                                                                | 0.269 (90)                     | 0.341 (85)                     |
| Hg(II)         | 0.868 (434)                                                               | 0.746 (249)                    | 0.508 (127)                    |
| Pb(II)         | 0.340 (170)                                                               | 0.514 (165)                    | 0.446 (112)                    |
| H <sup>+</sup> | 0.060 (30)                                                                | 0.085 (28)                     | 0.095 (24)                     |

**Table ST7B:** Fluorescence output of **L<sub>7</sub>-L<sub>9</sub>** with different ionic inputs.

| Inputs         | Quantum Yield $\phi$ (Enhancement Factor) ( $\lambda_{\text{ex}}=345$ nm) |                                |                                |
|----------------|---------------------------------------------------------------------------|--------------------------------|--------------------------------|
|                | <b>L<sub>7</sub></b><br>$\phi$                                            | <b>L<sub>8</sub></b><br>$\phi$ | <b>L<sub>9</sub></b><br>$\phi$ |
| None           | 0.001                                                                     | 0.001                          | 0.001                          |
| Mn(II)         | 0.036 (36)                                                                | 0.039 (39)                     | 0.032 (32)                     |
| Fe(II)         | 0.082 (82)                                                                | 0.091 (91)                     | 0.093 (93)                     |
| Co(II)         | 0.085 (85)                                                                | 0.101 (101)                    | 0.097 (97)                     |
| Ni(II)         | 0.037 (37)                                                                | 0.044 (44)                     | 0.062 (62)                     |
| Cu(II)         | 0.162 (162)                                                               | 0.153 (153)                    | 0.225 (225)                    |
| Zn(II)         | 0.201 (201)                                                               | 0.217 (217)                    | 0.251 (251)                    |
| Cd(II)         | 0.071 (71)                                                                | 0.075 (75)                     | 0.077 (077)                    |
| Ag(I)          | 0.146 (146)                                                               | 0.126 (126)                    | 0.118 (118)                    |
| Hg(II)         | 0.231 (231)                                                               | 0.378 (378)                    | 0.503 (503)                    |
| Pb(II)         | 0.106 (106)                                                               | 0.102 (102)                    | 0.108 (108)                    |
| H <sup>+</sup> | 0.136 (136)                                                               | 0.287 (287)                    | 0.467 (467)                    |



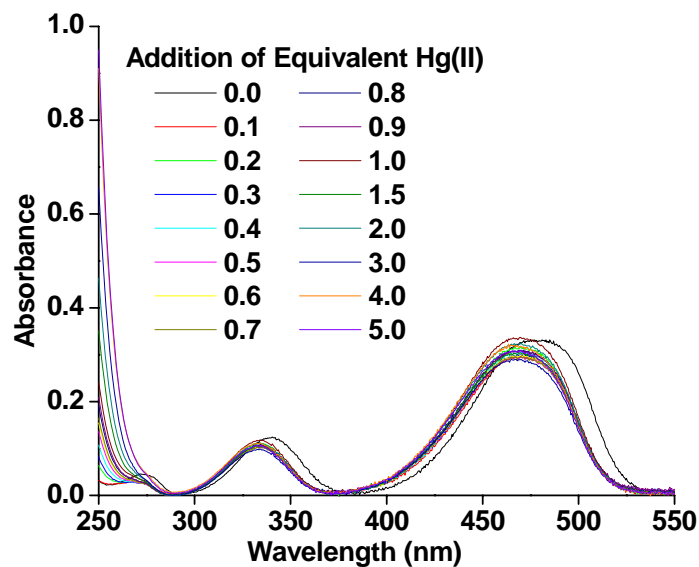

**Fig. S16:** Absorption spectra of  $L_1$  in presence of increasing concentration of  $Hg(II)$  ionic inputs in MeCN.

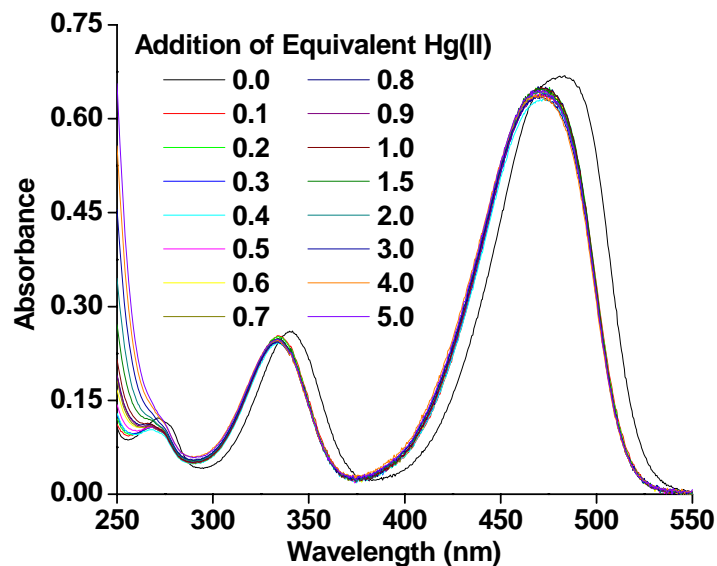

**Fig. S17:** Absorption spectra of  $L_2$  in presence of increasing concentration of  $Hg(II)$  ionic inputs in MeCN.

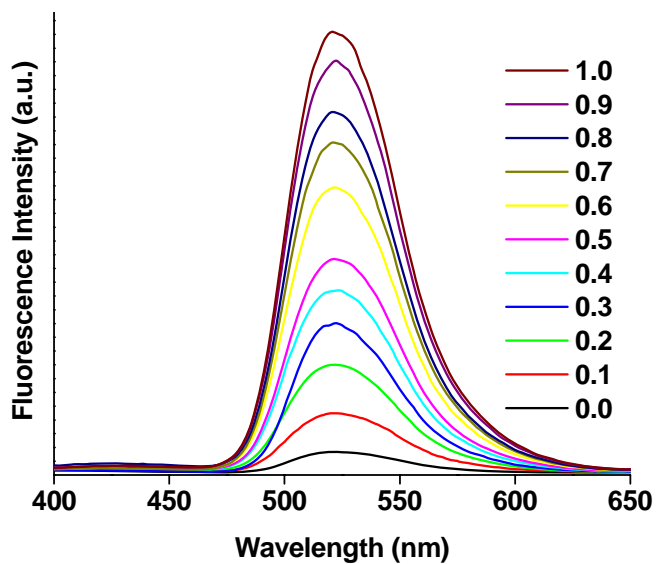

**Fig. S18:** Absorption spectra of L<sub>2</sub> in presence of increasing concentration of Hg(II) ionic inputs in MeCN.

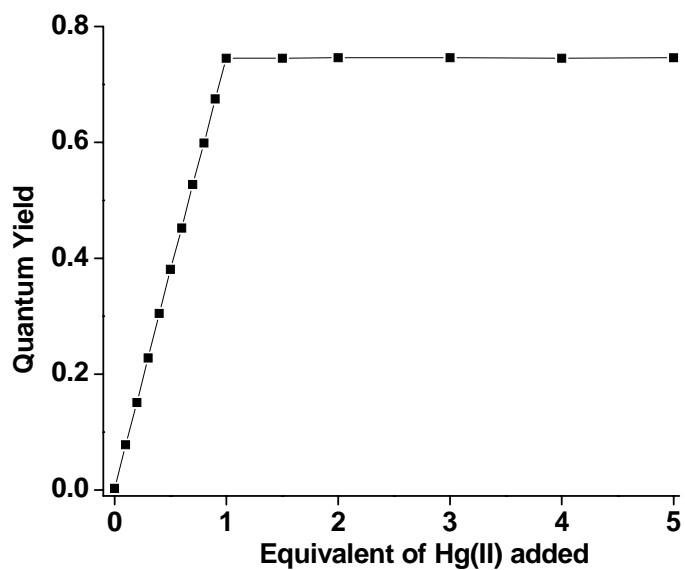

**Fig. S19:** Plots of fluorescence quantum yield of L<sub>2</sub> as a function of concentration of Hg(II) added in MeCN.

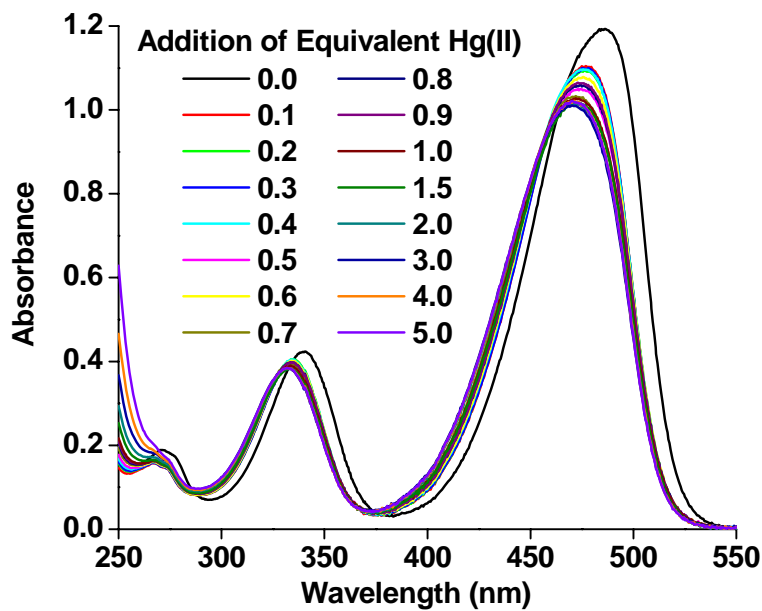

**Fig. S20:** Absorption spectra of  $L_3$  in presence of increasing concentration of Hg(II) ionic inputs in MeCN.

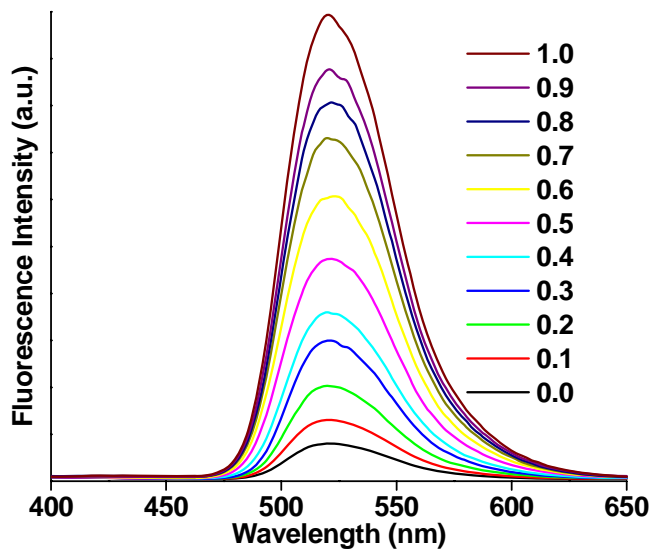

**Fig. S21:** Absorption spectra of  $L_3$  in presence of increasing concentration of Hg(II) ionic inputs in MeCN.

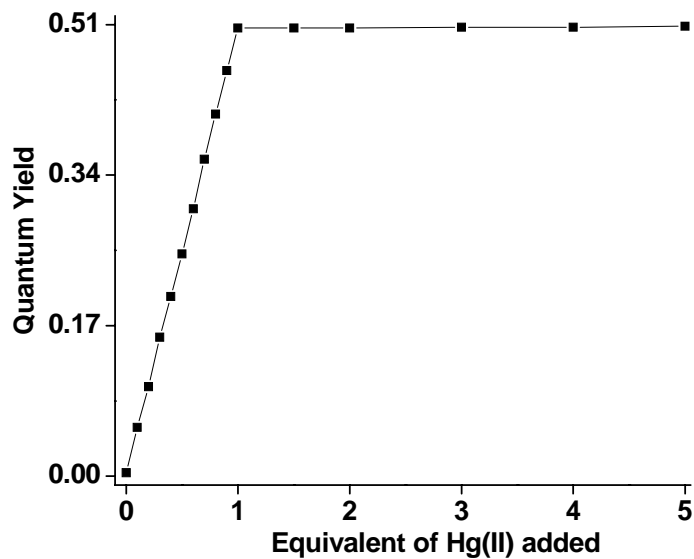

**Fig. S22:** Plots of fluorescence quantum yield of L<sub>3</sub> as a function of concentration of Hg(II) added in MeCN.

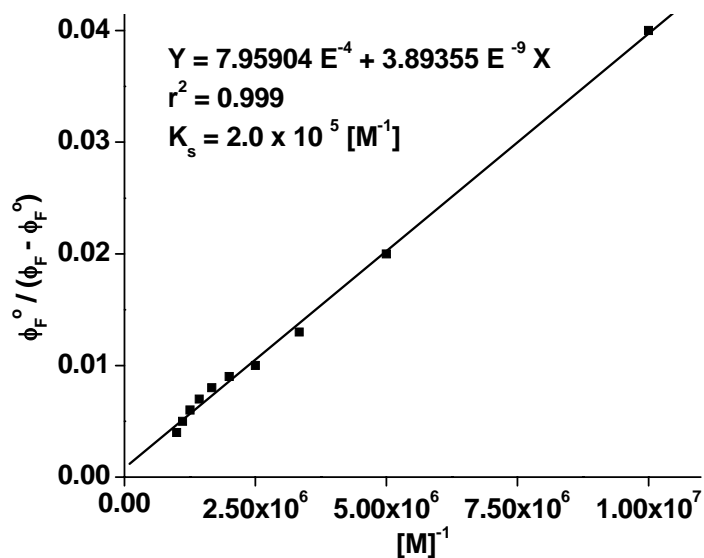

**Fig. S23:** Linear regression plots for complex stability constant determination of L<sub>2</sub> in presence of Hg(II) as ionic input in MeCN.

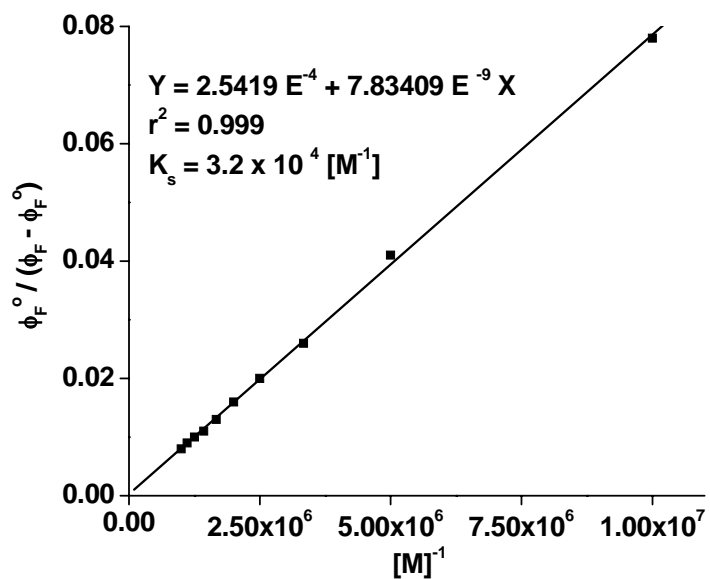

**Fig. S24:** Linear regression plots for complex stability constant determination of  $L_3$  in presence of Hg(II) as ionic input in MeCN.

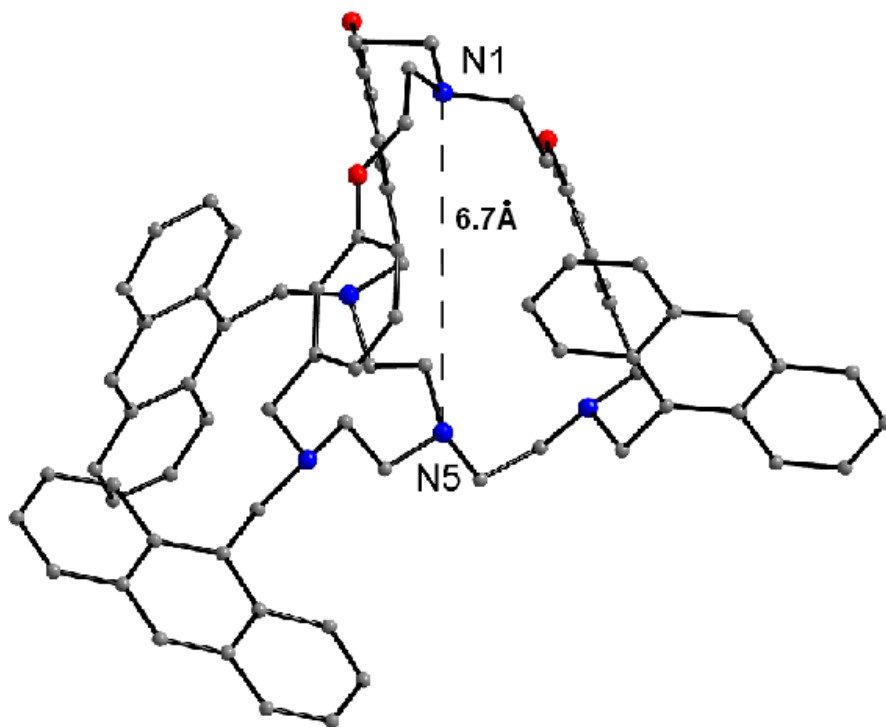

**FigS25:**Crystal Structure of  $L_{12}$

**Table ST8.** Crystal data and structure refinement for **L<sub>12</sub>**

|                                                             |                                                                                                      |
|-------------------------------------------------------------|------------------------------------------------------------------------------------------------------|
| Empirical formula                                           | C <sub>78</sub> H <sub>75</sub> N <sub>5</sub> O <sub>3</sub> , 2(C H <sub>2</sub> Cl <sub>2</sub> ) |
| Formula weight                                              | 1300.28                                                                                              |
| Crystal system                                              | Triclinic                                                                                            |
| Space group                                                 | P-1                                                                                                  |
| <i>a</i> , Å                                                | 11.970(5)                                                                                            |
| <i>b</i> , Å                                                | 13.569(5)                                                                                            |
| <i>c</i> , Å                                                | 21.610(5)                                                                                            |
| $\alpha$ (°)                                                | 74.456(5)                                                                                            |
| $\beta$ (°)                                                 | 87.681(5)                                                                                            |
| $\gamma$ (°)                                                | 84.415(5)                                                                                            |
| <i>V</i> , Å <sup>3</sup>                                   | 3365(2)                                                                                              |
| <i>Z</i>                                                    | 2                                                                                                    |
| $\rho_{\text{calc}}$ Mg/m <sup>3</sup>                      | 1.283                                                                                                |
| $\mu$ , mm <sup>-1</sup>                                    | 0.230                                                                                                |
| F(000)                                                      | 1372                                                                                                 |
| Independent refl.                                           | 12899                                                                                                |
| Refl. used ( <i>I</i> >2 $\sigma$ ( <i>I</i> ))             | 9016                                                                                                 |
| <i>R</i> <sub>int</sub> value                               | 0.0353                                                                                               |
| GOF                                                         | 0.849                                                                                                |
| Final <i>R</i> indices [ <i>I</i> >2 $\sigma$ ( <i>I</i> )] | 0.0735                                                                                               |
| <i>R</i> indices (all data)                                 | 0.1004                                                                                               |
